# Supplementary material for: Pickering emulsion polymerized smart magnetic poly(methyl methacrylate)/Fe2O3 composite particles and their stimulus-response
Source: Royal Society of Chemistry journal article supplement (doi:10.1039/c4ra17025c), 2015-01-01
Supplement: c4ra17025c1.pdf [file c4ra17025c1.pdf]

Electronic Supplementary Information

**Pickering emulsion polymerized smart magnetic poly(methyl methacrylate)/Fe<sub>2</sub>O<sub>3</sub> composite particles and their stimuli-response**

Woo Jin Ahn, Hyo Seung Jung, Hyoung Jin Choi\*

*Department of Polymer Science and Engineering, Inha University, Incheon 402-751, Korea*

*E-mail: [hjchoi@inah.ac.kr](mailto:hjchoi@inah.ac.kr); Fax: +82-32-865-5178; Tel: +82-32-860-7486*

**Experimental**

**Characterization**

Both the Fe<sub>2</sub>O<sub>3</sub> nanoparticles used and Pickering emulsion droplets were observed by transmission electron microscopy (TEM) (Philips CM200) and optical microscopy (OM) (Olympus BX51), respectively. The size and size distribution of the Fe<sub>2</sub>O<sub>3</sub> nanoparticles and PMMA/Fe<sub>2</sub>O<sub>3</sub> composite particles were determined by dynamic light scattering (DLS) (Photal ELS-8000). Mn and polydispersity index (PDI) of the PMMA produced by Pickering emulsion were determined by gel permeation chromatography (GPC) (Young Lin SP930D) coupled with an RI detector (RI 750F) and two columns (GPC KD-806 M x 2, Shodex). The eluent used was tetrahydrofuran (THF) at 40 °C and the flow rate was 1.0 mL/min.

**Results and discussion**

Fig. S1 shows the shape and size of the Fe<sub>2</sub>O<sub>3</sub> nanoparticles. Fe<sub>2</sub>O<sub>3</sub> nanoparticles have angled edge, random shape and wide diameter range. These random size particles affect to size of the emulsion droplet.<sup>50</sup>

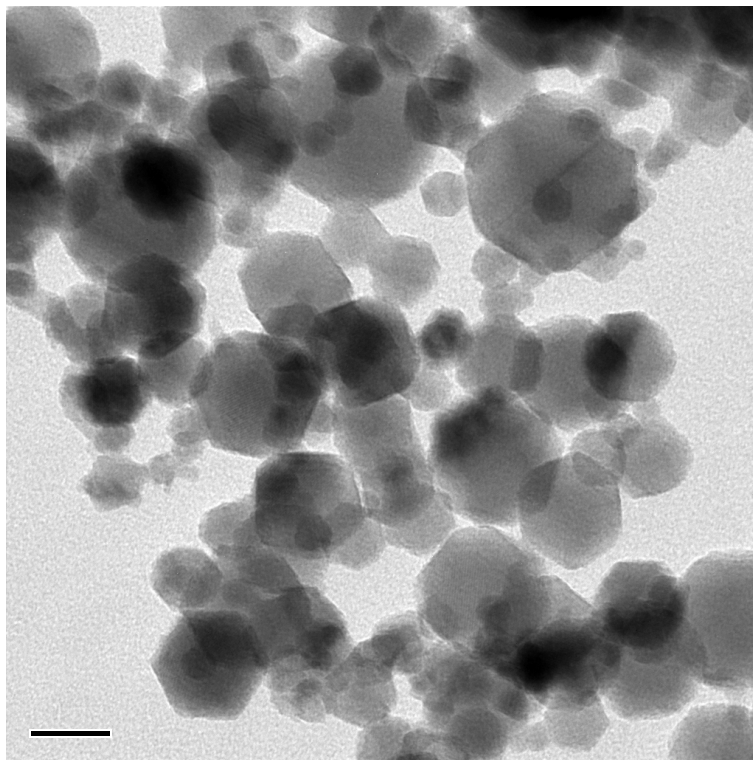

Fig. S1 TEM image of the Fe<sub>2</sub>O<sub>3</sub> nanoparticles.

Fig. S2 shows the size distribution of the Fe<sub>2</sub>O<sub>3</sub> nanoparticles (a) and PMMA/Fe<sub>2</sub>O<sub>3</sub> composite particles measured by dynamic light scattering (DLS). The average size of the Fe<sub>2</sub>O<sub>3</sub> nanoparticles and PMMA/Fe<sub>2</sub>O<sub>3</sub> composite particles is 36 nm, 275 nm respectively.

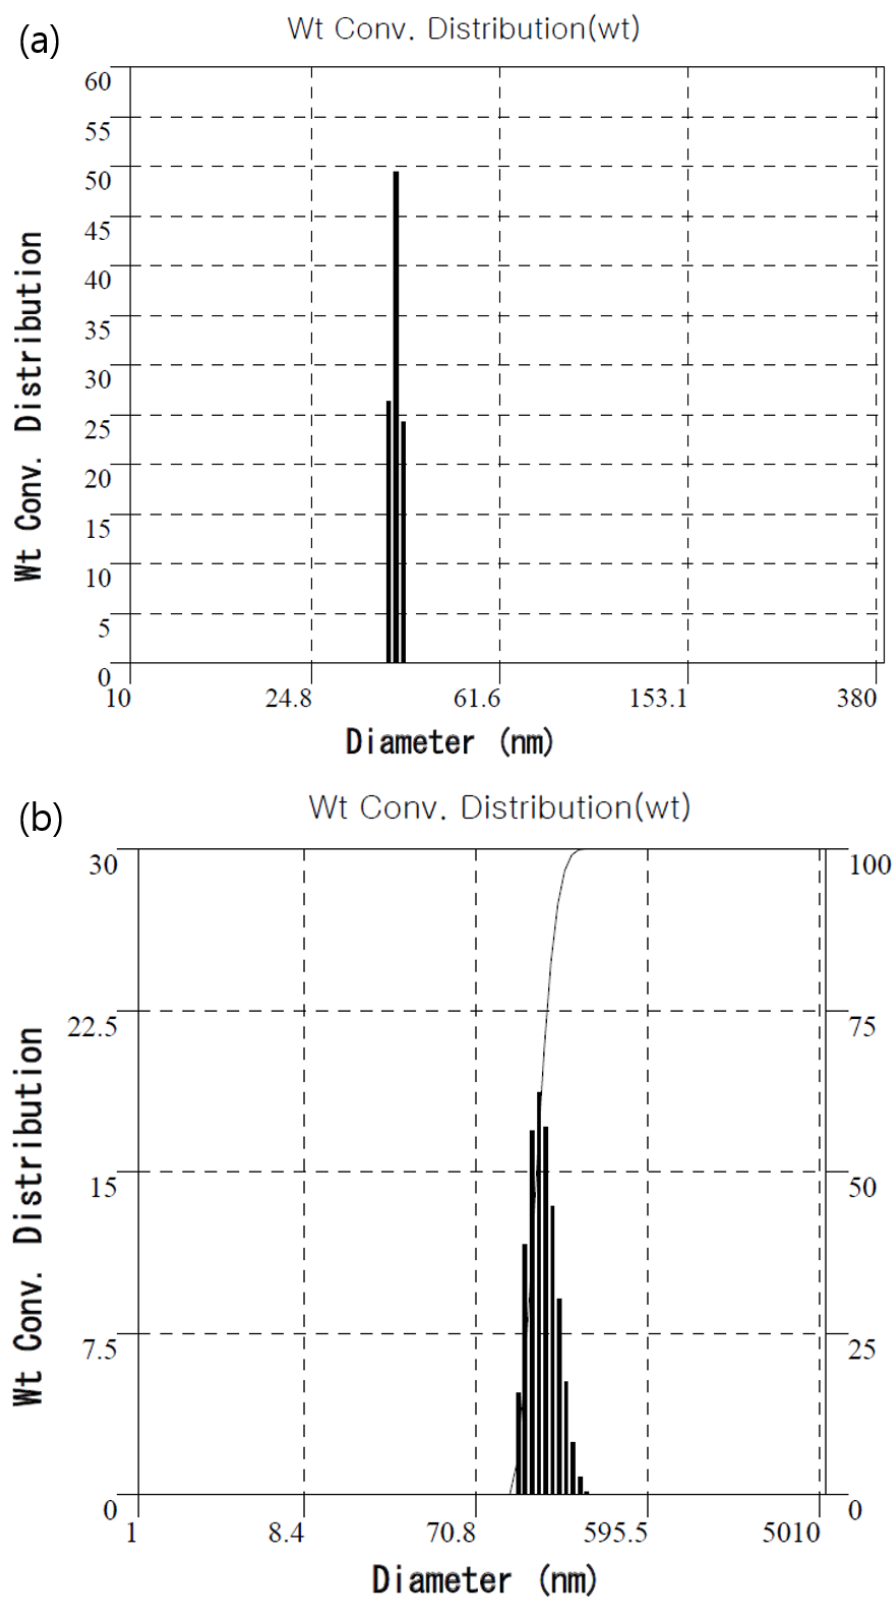

Fig. S2 Particle size distribution of the Fe<sub>2</sub>O<sub>3</sub> nanoparticles (a) and PMMA/Fe<sub>2</sub>O<sub>3</sub> composite particles.

Optical image of the Pickering emulsions prepared from Fe<sub>2</sub>O<sub>3</sub> nanoparticles before polymerization is shown in Fig. S3. They are methylmethacrylate (MMA) monomers in aqueous emulsions stabilized by Fe<sub>2</sub>O<sub>3</sub> nanoparticles. From the image, emulsion droplets observed to be with a wide size range from 0.5  $\mu$ m to 8  $\mu$ m.

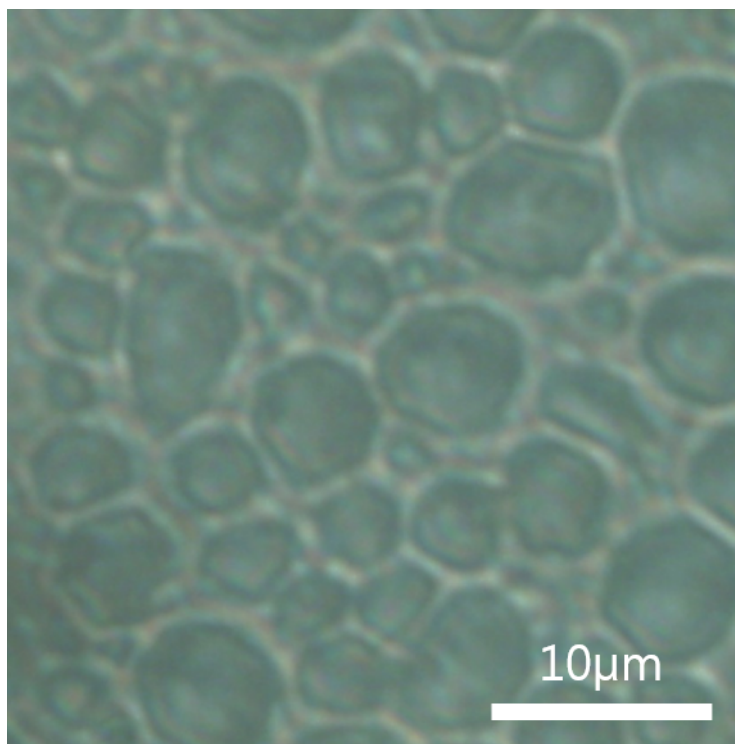

Fig. S3 Optical microscope image of the MMA drops surrounded by Fe<sub>2</sub>O<sub>3</sub> nanoparticles.

Fig. S4 shows the evolution of the GPC traces for the PMMA extracted from the PMMA/Fe<sub>2</sub>O<sub>3</sub> composites. The number averaged molecular weight ( $M_n$ ) of the PMMA was 247000 g/mol and the PDI was 2.64.

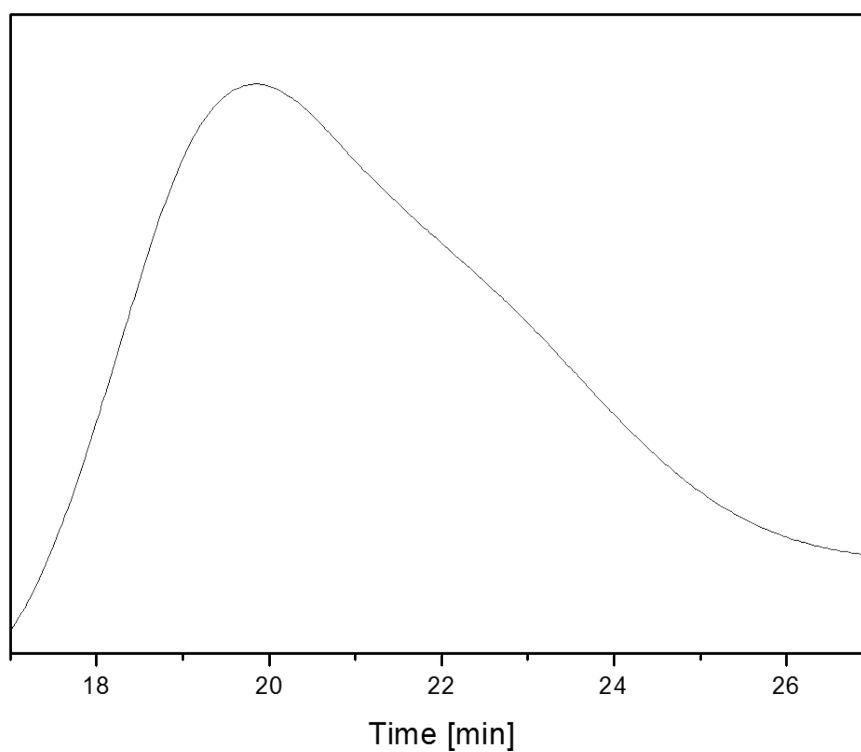

Fig. S4 Evolution of the GPC traces of PMMA in the PMMA/Fe<sub>2</sub>O<sub>3</sub> composite.

## Reference

51 B. P. Binks and S. O. Lumsdon, *Langmuir*, 2001, **17**, 4540
